# Supplementary material
Source: Springer Nature journal article supplement (http://www.springermedizin.de/resource/supplementary/12874_2011_887_MOESM1_ESM.pdf/9432958)

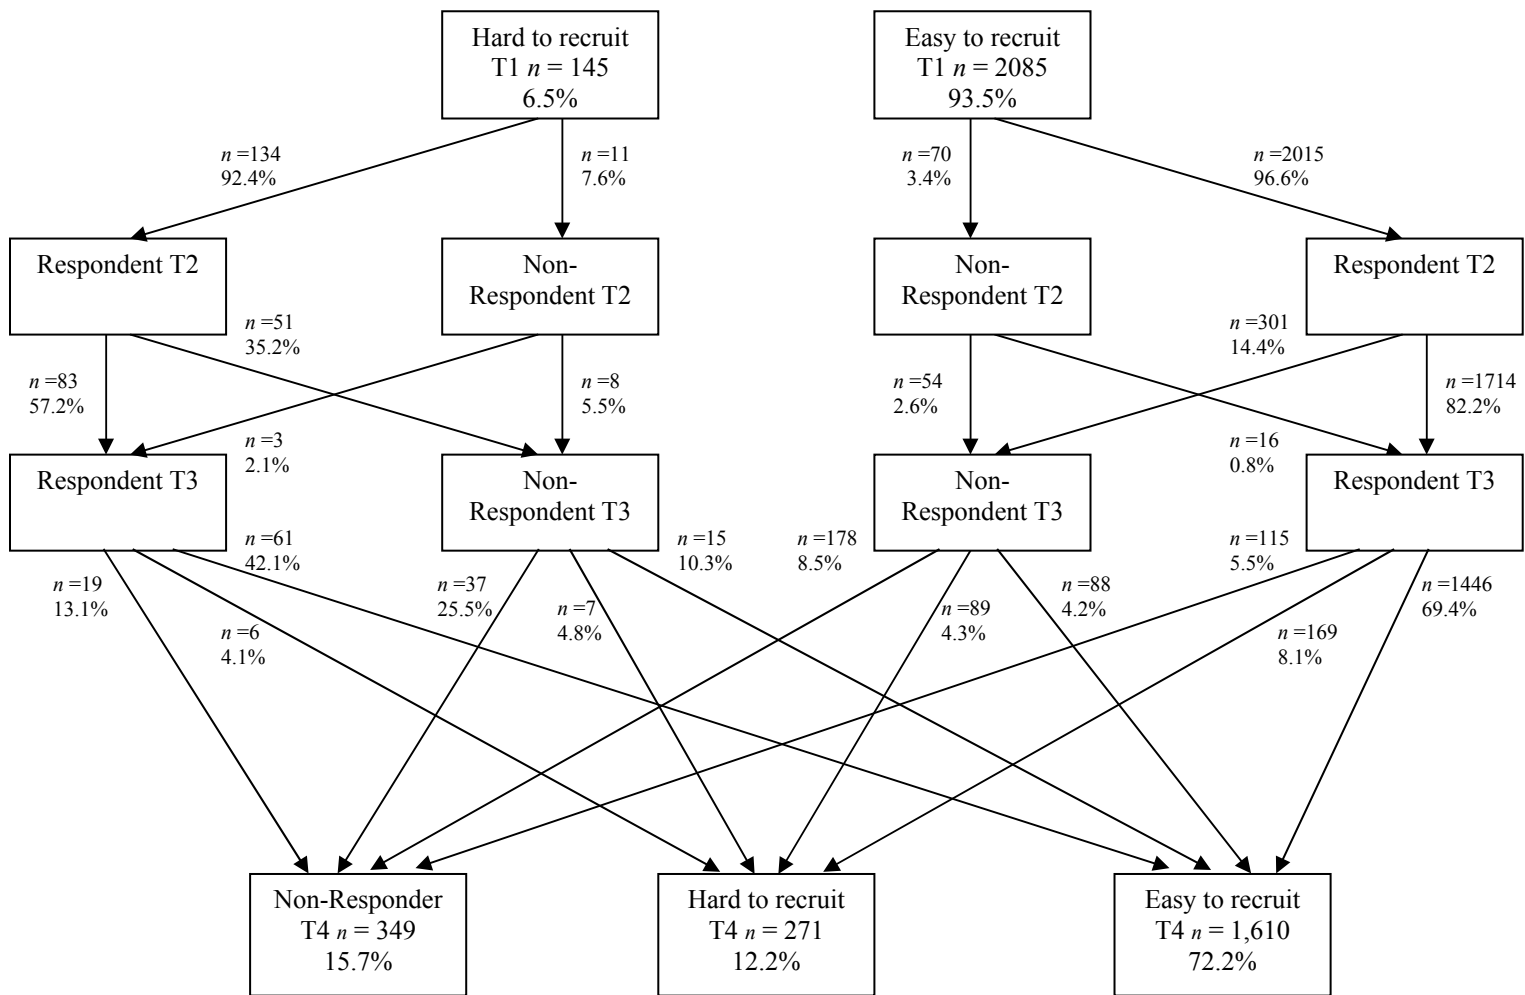

Supplement: MOESM1 [file 9432958]
